# Supplementary material for: Comparison of Intestinal Permeability Methods in Broilers over a 6-Week Growth Period
Source: MDPI journal article supplement (doi:10.3390/poultry2030028), 2023-08-04
Supplement: s1 [file s1]

Supplemental Table S1. Diet Composition for both broiler replications

| <b>Ingredients, %</b>     | <b>Units</b> | <b>Starter (0-14 d)</b> | <b>Grower (15-28 d)</b> | <b>Finisher (29-42 d)</b> |
|---------------------------|--------------|-------------------------|-------------------------|---------------------------|
| Corn                      | %            | 55.01                   | 56.47                   | 60.79                     |
| Soybean meal              | %            | 36.23                   | 34.30                   | 29.55                     |
| DDG                       | %            | 3.00                    | 3.00                    | 3.00                      |
| All Veg 4000              | %            | 1.97                    | 2.85                    | 3.61                      |
| Sodium Chloride           | %            | 0.38                    | 0.34                    | 0.33                      |
| Limestone                 | %            | 1.38                    | 1.27                    | 1.22                      |
| Dicalcium Phosphate       | %            | 0.86                    | 0.66                    | 0.42                      |
| Vitamin Premix<br>(VTM88) | %            | 0.62                    | 0.62                    | 0.63                      |
| Choline Chloride          | %            | 0.10                    | 0.10                    | 0.10                      |
| L-Lys HCl                 | %            | 0.12                    | 0.10                    | 0.10                      |
| DL-Met                    | %            | 0.26                    | 0.25                    | 0.22                      |
| L-Thr                     | %            | 0.03                    | 0.01                    | 0.00                      |
| Phytase                   | %            | 0.04                    | 0.04                    | 0.04                      |
| <i>Total</i>              |              | 100.00                  | 100.00                  | 100.00                    |
| <b>Calculated</b>         |              |                         |                         |                           |
| <b>Composition</b>        |              |                         |                         |                           |
| Metabolizable energy      | kcal/kg      | 3080.48                 | 3151.29                 | 3235.75                   |
| Crude protein             | %            | 23.11                   | 22.27                   | 20.31                     |
| Fat                       | %            | 4.85                    | 5.75                    | 6.61                      |
| Fiber                     | %            | 2.76                    | 2.73                    | 2.67                      |
| Calcium                   | %            | 0.84                    | 0.74                    | 0.66                      |
| Phosphorus                | %            | 0.90                    | 0.85                    | 0.78                      |
| Available Phosphorus      | %            | 0.60                    | 0.56                    | 0.51                      |
| Met                       | %            | 0.62                    | 0.60                    | 0.54                      |
| Cys                       | %            | 0.38                    | 0.37                    | 0.34                      |
| Met+Cys                   | %            | 1.05                    | 1.02                    | 0.94                      |
| Lys                       | %            | 1.34                    | 1.27                    | 1.14                      |
| His                       | %            | 0.61                    | 0.59                    | 0.55                      |
| Tryp                      | %            | 0.27                    | 0.25                    | 0.23                      |
| Thr                       | %            | 0.92                    | 0.87                    | 0.79                      |
| Arg                       | %            | 1.54                    | 1.48                    | 1.32                      |
| Iso                       | %            | 0.99                    | 0.95                    | 0.86                      |
| Leu                       | %            | 2.00                    | 1.94                    | 1.80                      |
